# Supplementary material for: The Ps and Qs of alarmone synthesis in Staphylococcus aureus
Source: PubMed Central journal article supplement (PMC6793942; doi:10.1371/journal.pone.0213630), 2019-10-15
Supplement: pone.0213630.s001.pdf [file pone.0213630.s001.pdf]

**S1 Table. Sequences of PCR Primers Used**

| Primer name  | Primer sequence                                                      |
|--------------|----------------------------------------------------------------------|
| M13 Forward  | GTAAAACGACGGCCAG                                                     |
| M13 Reverse  | CAGGAAACAGCTATGAC                                                    |
| Sa-rel-Fb2   | CGCGGATCCATGAACAACGAATATCCATATAGTG                                   |
| Sa-rel-Re2   | CCGGAATTCCTAGTTCCAAACTCTTGTTACTGTATA                                 |
| Sa-rel-tFnco | CATGCCATGGGCAACAACGAATATCCATATAGTGC                                  |
| Sa-rel-tRsal | ACGCGTCGACTCAGTGGTGGTGGTGGTGGTGGCTGCTTCCTCC<br>GGTTCCATAAATTCTTGAGCG |
| SARelPfor    | ATATGGATCCATGTATGTAGATCGAAAACCATCAC                                  |
| SAVRelPrev   | ATATCTCGAGCTACTCTGTTATTTTCAGAATGAATTTG                               |
| SARelQfor    | ATATGGATCCCATATGAATCAATGGGATCAGTTCTTAAC                              |
| SARelQrev    | AATTCTCGAGTTAAAGCTTATCATTTTCATGTTTTTTAGAACGTTT                       |
| SA1919for1   | ATATGGATCCCATATGGCTAAAACATATATTTTCGGACA                              |
| SA1919rev1   | TAACTCGAGTTAAAGCTTTTTTGTAAATGCTTCAGTGATTT                            |
| SMRelPfor    | ATATGGATCCATGTCACAAGAAACGATCTATGG                                    |
| SMRelPrev    | ATATCTCGAGTTATTCACCACTTCTTACAATC                                     |
| SMRelQfor    | ATATGGATCCATGAATTGGGAAGAATTTCTGG                                     |
| SMRelQrev    | ATATCTCGAGTTATCGGTAAAGTTCATCTGTG                                     |
