# Supplementary material for: The Ps and Qs of alarmone synthesis in Staphylococcus aureus
Source: PubMed Central journal article supplement (PMC6793942; doi:10.1371/journal.pone.0213630), 2019-10-15
Supplement: pone.0213630.s002.pdf [file pone.0213630.s002.pdf]

**S2 Table. Sa-RelP and Sa-RelQ molar specific activities with/without ppGpp stimulation at pH 7.6**

| Protein tested | Reaction  | Reaction pH | Reaction rate with no alarmone added ( $\mu\text{mol}\cdot\text{min}^{-1}\cdot\mu\text{mol}^{-1}$ ) | Reaction rate with 100 $\mu\text{M}$ ppGpp added ( $\mu\text{mol}\cdot\text{min}^{-1}\cdot\mu\text{mol}^{-1}$ ) | Fold change   |
|----------------|-----------|-------------|-----------------------------------------------------------------------------------------------------|-----------------------------------------------------------------------------------------------------------------|---------------|
| Sa-RelQ        | GMP + ATP | pH 7.6      | 0.28 $\pm$ 0.04                                                                                     | 9.64 $\pm$ 0.52                                                                                                 | 34 $\pm$ 1.9  |
| Sa-RelQ        | GMP + ATP | pH 9.0      | 0.46 $\pm$ 0.25                                                                                     | 11.7 $\pm$ 0.8                                                                                                  | 26 $\pm$ 2    |
| Sa-RelQ        | GDP + ATP | pH 7.6      | 6.0 $\pm$ 0.84                                                                                      | 9.44 $\pm$ 1.48                                                                                                 | 1.6 $\pm$ 0.3 |
| Sa-RelQ        | GDP + ATP | pH 9.0      | 15.0 $\pm$ 4.3                                                                                      | 23.4 $\pm$ 3.1                                                                                                  | 1.6 $\pm$ 0.1 |
| Sa-RelQ        | GTP + ATP | pH 7.6      | 3.44 $\pm$ 3.40                                                                                     | 4.96 $\pm$ 0.32                                                                                                 | 1.4 $\pm$ 0.2 |
| Sa-RelQ        | GTP + ATP | pH 9.0      | 8.25 $\pm$ 1.53                                                                                     | 14.2 $\pm$ 3.1                                                                                                  | 1.7 $\pm$ 0.4 |
| Sa-RelP        | GMP + ATP | pH 7.6      | 3.0 $\pm$ 0.88                                                                                      | N.D.                                                                                                            | -             |
| Sa-RelP        | GMP + ATP | pH 9.0      | 3.69 $\pm$ 0.47                                                                                     | 2.65 $\pm$ 0.23                                                                                                 | 0.7 $\pm$ 0.1 |
| Sa-RelP        | GDP + ATP | pH 7.6      | 48.9 $\pm$ 2.3                                                                                      | N.D.                                                                                                            | -             |
| Sa-RelP        | GDP + ATP | pH 9.0      | 99.1 $\pm$ 11.6                                                                                     | 82.4 $\pm$ 8.0                                                                                                  | 0.8 $\pm$ 0.2 |
| Sa-RelP        | GTP + ATP | pH 7.6      | 18.0 $\pm$ 2.2                                                                                      | N.D.                                                                                                            | -             |
| Sa-RelP        | GTP + ATP | pH 9.0      | 53.8 $\pm$ 18.0                                                                                     | 45.5 $\pm$ 23.1                                                                                                 | 0.9 $\pm$ 0.5 |

This table summarizes the molar specific activities (i.e. reaction rates in units of micromoles of alarmone product formed per minute per micromole of protein) for Sa-RelQ and Sa-RelP proteins under standardized conditions at pH 7.6 in the absence of stimulatory alarmone (no added alarmone), as well as in the presence of 100  $\mu\text{M}$  ppGpp. The values are reported as mean  $\pm$  standard deviation, based on data from 2–4 experimental replicates. The fold-change represents the ratio of ppGpp-stimulated rate/non-stimulated rate, for each of the respective (pp)pGpp-synthesizing reactions. Data for reactions performed at pH 9.0 taken from Table 3.
